# Supplementary material for: Triangular silver nanoprism-based chemosensor for recognition of hyaluronic acid in human biofluids: a new platform for monitoring osteoarthritis treatment using smartphone-assisted digital image analysis
Source: Royal Society of Chemistry journal article supplement (doi:10.1039/d4ra05396f), 2024-01-01
Supplement: d4ra05396f3.pdf [file d4ra05396f3.pdf]

## Supporting information

### **Triangular silver nanoprisms-based chemosensor for recognition of hyaluronic acid in human biofluids: A new platform for monitoring osteoarthritis treatment using smartphone-assisted digital image analysis**

Zahra Sabri <sup>a</sup>, Farnaz Bahavarnia <sup>b</sup>, Mohammad Hasanzadeh <sup>c,\*</sup>, Nasrin Shadjou <sup>d</sup>

<sup>a</sup> Nutrition Research Center, Tabriz University of Medical Sciences, Tabriz, Iran.

<sup>b</sup> Food and Drug safety Research Center, Tabriz University of Medical Sciences, Tabriz, Iran.

<sup>c</sup> Pharmaceutical Analysis Research Center, Tabriz University of Medical Sciences, Tabriz, Iran.

<sup>d</sup> Department of Nanotechnology, Faculty of Chemistry, Urmia University, Urmia, Iran.

#### **Corresponding Author**

\* (Mohammad Hasanzadeh) Pharmaceutical Analysis Research Center, Tabriz University of Medical Sciences, Tabriz, Iran.

E-mail address: (\*) [hasanzadehm@tbzmed.ac.ir](mailto:hasanzadehm@tbzmed.ac.ir);

**Results**

|                                | Size (d.nm)   | % Intensity | St Dev (d.nm) |
|--------------------------------|---------------|-------------|---------------|
| <b>Z-Average (d.nm):</b> 110.6 | Peak 1: 132.2 | 89.5        | 57.53         |
| <b>Pdl:</b> 0.406              | Peak 2: 3407  | 10.5        | 1241          |
| <b>Intercept:</b> 0.830        | Peak 3: 0.000 | 0.0         | 0.000         |

Result quality **Refer to quality report**

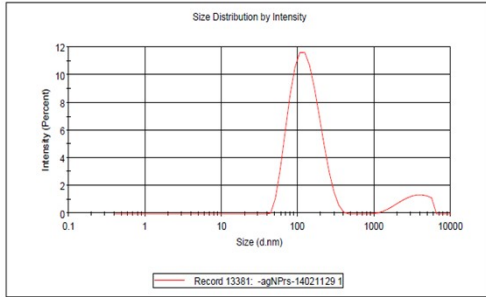

**Results**

|                                | Size (d.nm)   | % Number | St Dev (d.nm) |
|--------------------------------|---------------|----------|---------------|
| <b>Z-Average (d.nm):</b> 110.6 | Peak 1: 68.80 | 100.0    | 22.22         |
| <b>Pdl:</b> 0.406              | Peak 2: 0.000 | 0.0      | 0.000         |
| <b>Intercept:</b> 0.830        | Peak 3: 0.000 | 0.0      | 0.000         |

Result quality **Refer to quality report**

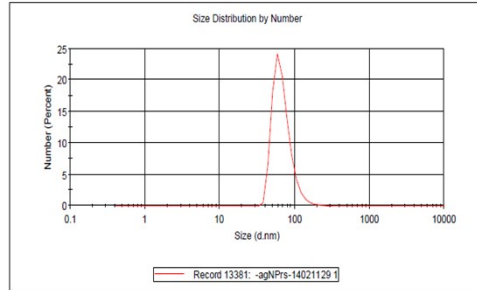

**A**

**Results**

|                                | Size (d.nm)   | % Volume | St Dev (d.nm) |
|--------------------------------|---------------|----------|---------------|
| <b>Z-Average (d.nm):</b> 110.6 | Peak 1: 101.5 | 86.8     | 52.10         |
| <b>Pdl:</b> 0.406              | Peak 2: 1609  | 5.1      | 349.6         |
| <b>Intercept:</b> 0.830        | Peak 3: 4308  | 8.1      | 1177          |

Result quality **Refer to quality report**

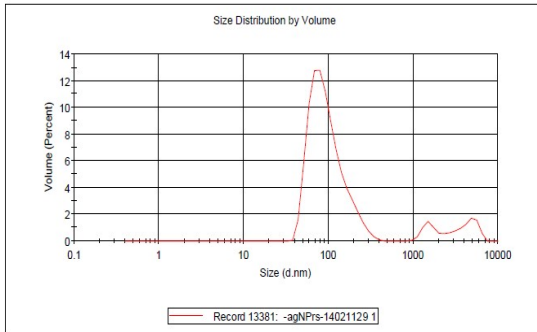

**Results**

|                                    | Mean (mV)     | Area (%) | St Dev (mV) |
|------------------------------------|---------------|----------|-------------|
| <b>Zeta Potential (mV):</b> -14.6  | Peak 1: -14.6 | 100.0    | 6.31        |
| <b>Zeta Deviation (mV):</b> 6.31   | Peak 2: 0.00  | 0.0      | 0.00        |
| <b>Conductivity (mS/cm):</b> 0.957 | Peak 3: 0.00  | 0.0      | 0.00        |

Result quality **Good**

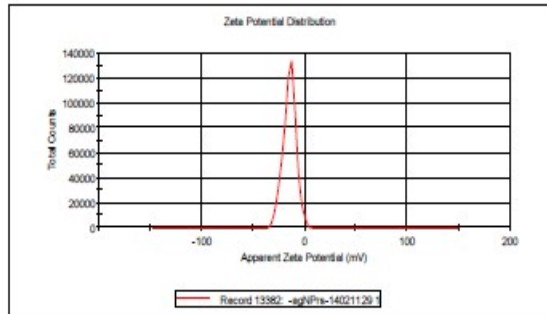

Results

|                   | Size (d.n...) | % Number      | St Dev (d.n... |       |
|-------------------|---------------|---------------|----------------|-------|
| Z-Average (d.nm): | 335.0         | Peak 1: 6.131 | 100.0          | 1.371 |
| Pdi:              | 0.386         | Peak 2: 0.000 | 0.0            | 0.000 |
| Intercept:        | 0.471         | Peak 3: 0.000 | 0.0            | 0.000 |

Result quality Refer to quality report

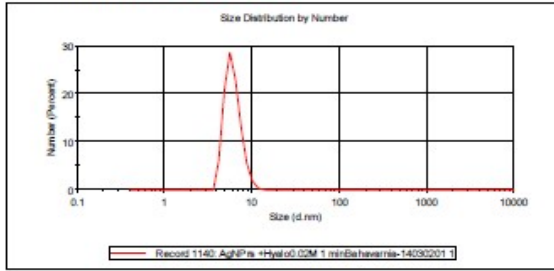

Results

| Size (b.nm)   | % Volume | St Dev (b.nm) |
|---------------|----------|---------------|
| Peak 1: 77.22 | 8.8      | 22.22         |
| Peak 2: 6.888 | 99.2     | 1.808         |
| Peak 3: 0.000 | 0.0      | 0.000         |

Result quality Refer to quality report

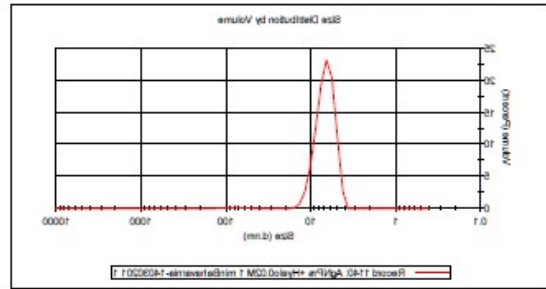

Results

|                   | Size (d.n...) | % Intensity   | St Dev (d.n... |       |
|-------------------|---------------|---------------|----------------|-------|
| Z-Average (d.nm): | 335.0         | Peak 1: 91.72 | 89.2           | 24.17 |
| Pdi:              | 0.386         | Peak 2: 8.230 | 10.8           | 2.021 |
| Intercept:        | 0.471         | Peak 3: 0.000 | 0.0            | 0.000 |

Result quality Refer to quality report

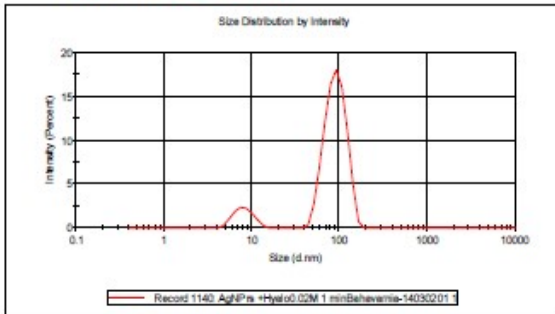

Results

|                       | Mean (mV) | Area (%)      | St Dev (mV) |      |
|-----------------------|-----------|---------------|-------------|------|
| Zeta Potential (mV):  | 0.749     | Peak 1: 0.749 | 100.0       | 2.92 |
| Zeta Deviation (mV):  | 2.92      | Peak 2: 0.00  | 0.0         | 0.00 |
| Conductivity (mS/cm): | 1.21      | Peak 3: 0.00  | 0.0         | 0.00 |

Result quality See result quality report

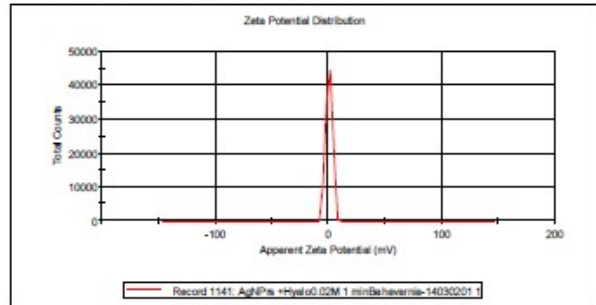

B

**Results**

|                    | Size (d.n.m) | % Number | St Dev (d.n.m) |
|--------------------|--------------|----------|----------------|
| Z-Average (d.n.m): | 103.6        | 100.0    | 1.113          |
| Pdi:               | 0.344        | 0.0      | 0.000          |
| Intercept:         | 0.623        | 0.0      | 0.000          |
| Peak 1:            | 5.451        | 100.0    | 1.113          |
| Peak 2:            | 0.000        | 0.0      | 0.000          |
| Peak 3:            | 0.000        | 0.0      | 0.000          |

Result quality Refer to quality report

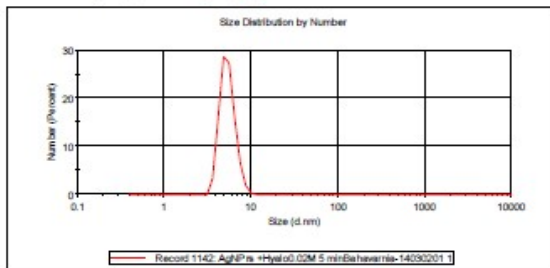

**Results**

|                    | Size (d.n.m) | % Intensity | St Dev (d.n.m) |
|--------------------|--------------|-------------|----------------|
| Z-Average (d.n.m): | 103.6        | 79.7        | 44.18          |
| Pdi:               | 0.344        | 8.4         | 573.0          |
| Intercept:         | 0.623        | 8.2         | 1.343          |
| Peak 1:            | 96.93        | 79.7        | 44.18          |
| Peak 2:            | 5067         | 8.4         | 573.0          |
| Peak 3:            | 6.713        | 8.2         | 1.343          |

Result quality Refer to quality report

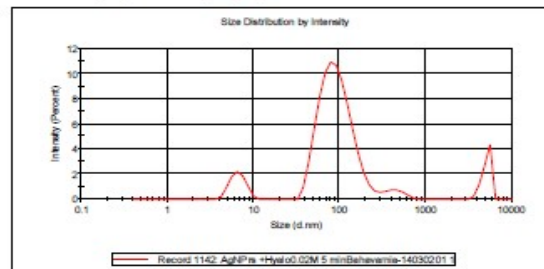

C

**Results**

|                    | Size (d.n.m) | % Volume | St Dev (d.n.m) |
|--------------------|--------------|----------|----------------|
| Z-Average (d.n.m): | 103.6        | 0.8      | 31.19          |
| Pdi:               | 0.344        | 0.1      | 739.4          |
| Intercept:         | 0.623        | 99.2     | 1.334          |
| Peak 1:            | 68.17        | 0.8      | 31.19          |
| Peak 2:            | 5257         | 0.1      | 739.4          |
| Peak 3:            | 6.014        | 99.2     | 1.334          |

Result quality Refer to quality report

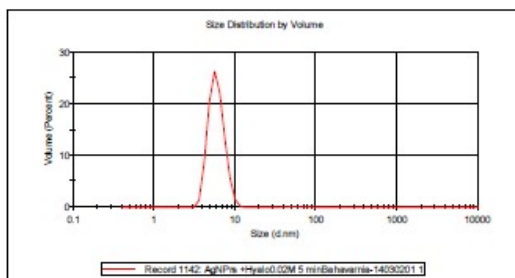

**Results**

|                       | Mean (mV) | Area (%) | St Dev (mV) |
|-----------------------|-----------|----------|-------------|
| Zeta Potential (mV):  | 7.88      | 62.0     | 5.31        |
| Zeta Deviation (mV):  | 9.11      | 38.0     | 5.93        |
| Conductivity (mS/cm): | 0.979     | 0.0      | 0.00        |
| Peak 1:               | 12.9      | 62.0     | 5.31        |
| Peak 2:               | -0.962    | 38.0     | 5.93        |
| Peak 3:               | 0.00      | 0.0      | 0.00        |

Result quality See result quality report

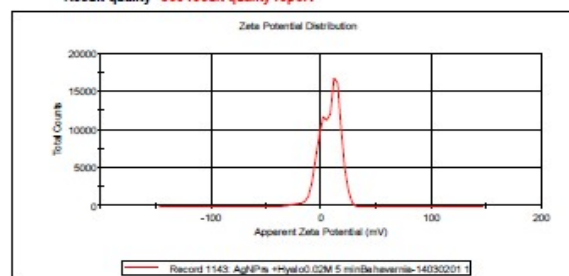

**Fig. S1. (A-C)** DLS and Zp of TA-AgNPrs, TA-AgNPrs-HA after 1min reaction time and TA-AgNPrs-HA after 5 min reaction time, respectively.

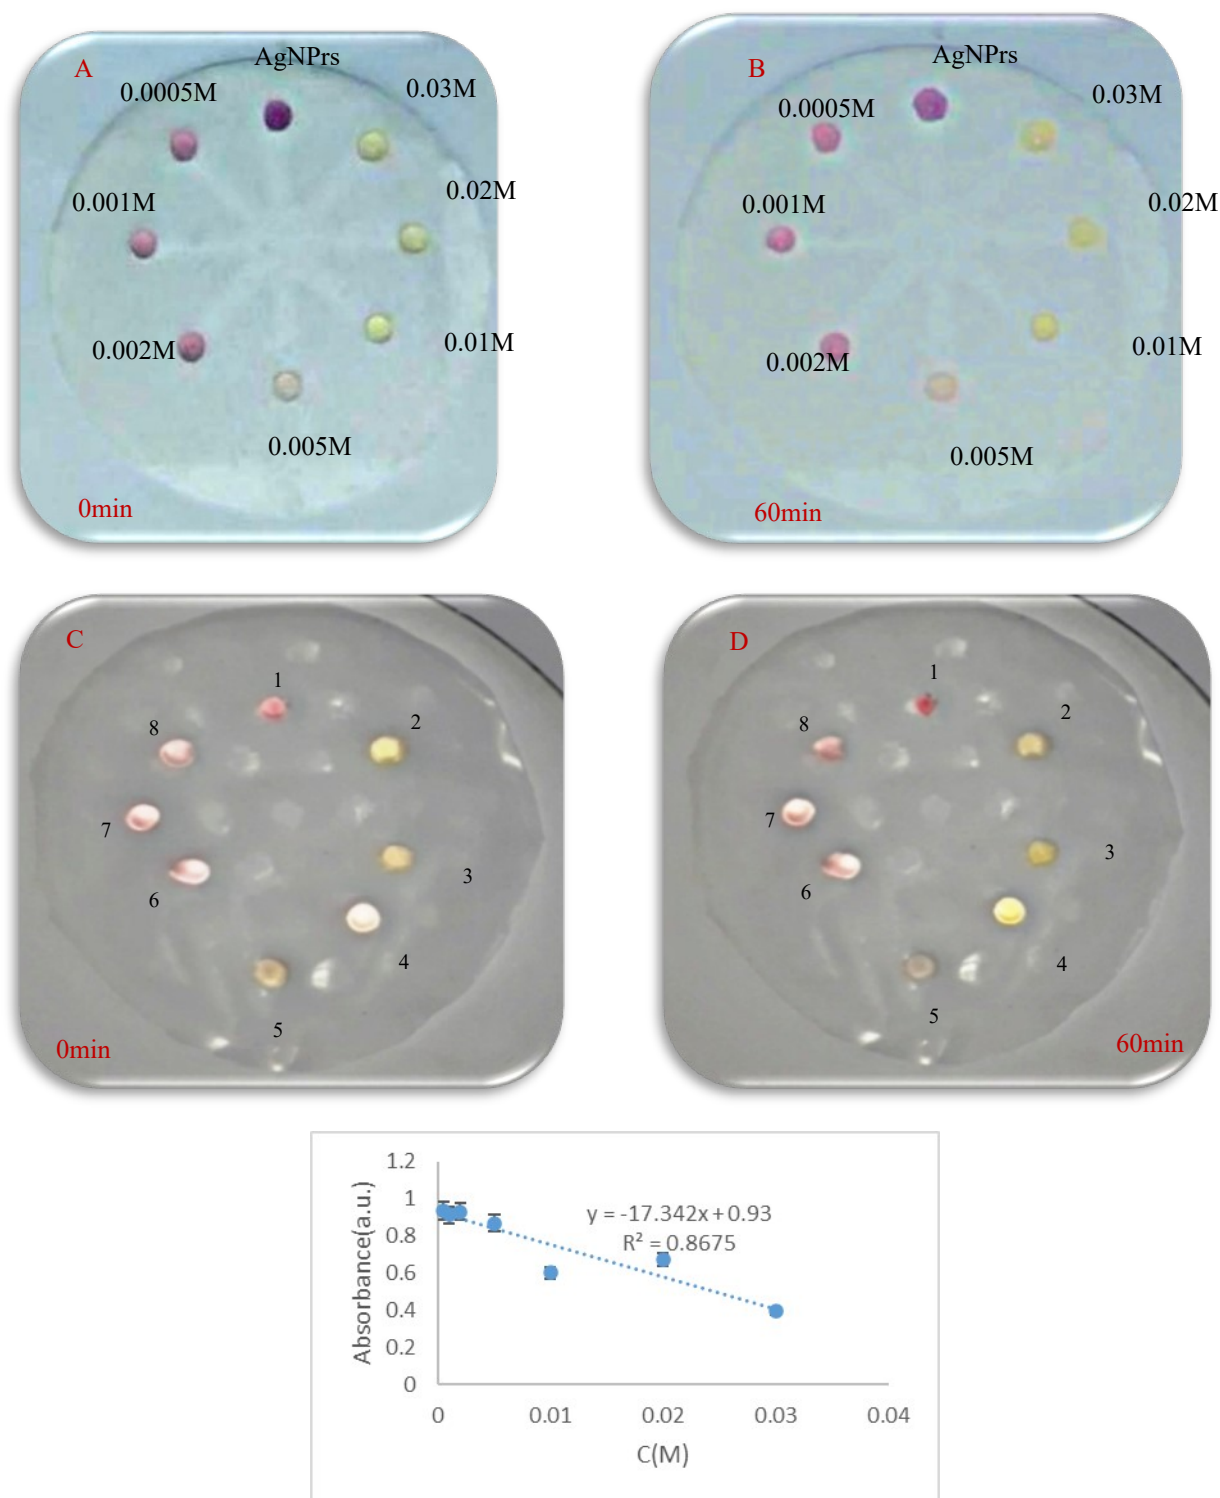

**Fig. S2.** (A and B) High-resolution images of  $\mu$ PAD for (zone 1) TA-AgNPrs and (zone 2-9) TA-AgNPrs/HA in different concentration of analyte 0.03, 0.02, 0.01, 0.005, 0.002, 0.001, 0.0005M, respectively, in two incubation times of 0 and 60 min. (C and D) High-resolution images of microfluidic parafilm for (zone 1) AgNPrs and (zone 2-9) TA-AgNPrs/HA in different concentration of analyte 0.03, 0.02, 0.01, 0.005, 0.002, 0.001, 0.0005 M, respectively, , in two incubation times of 0 and 60 min. E) Calibration curves obtained by Beer's and Lambert's laws.

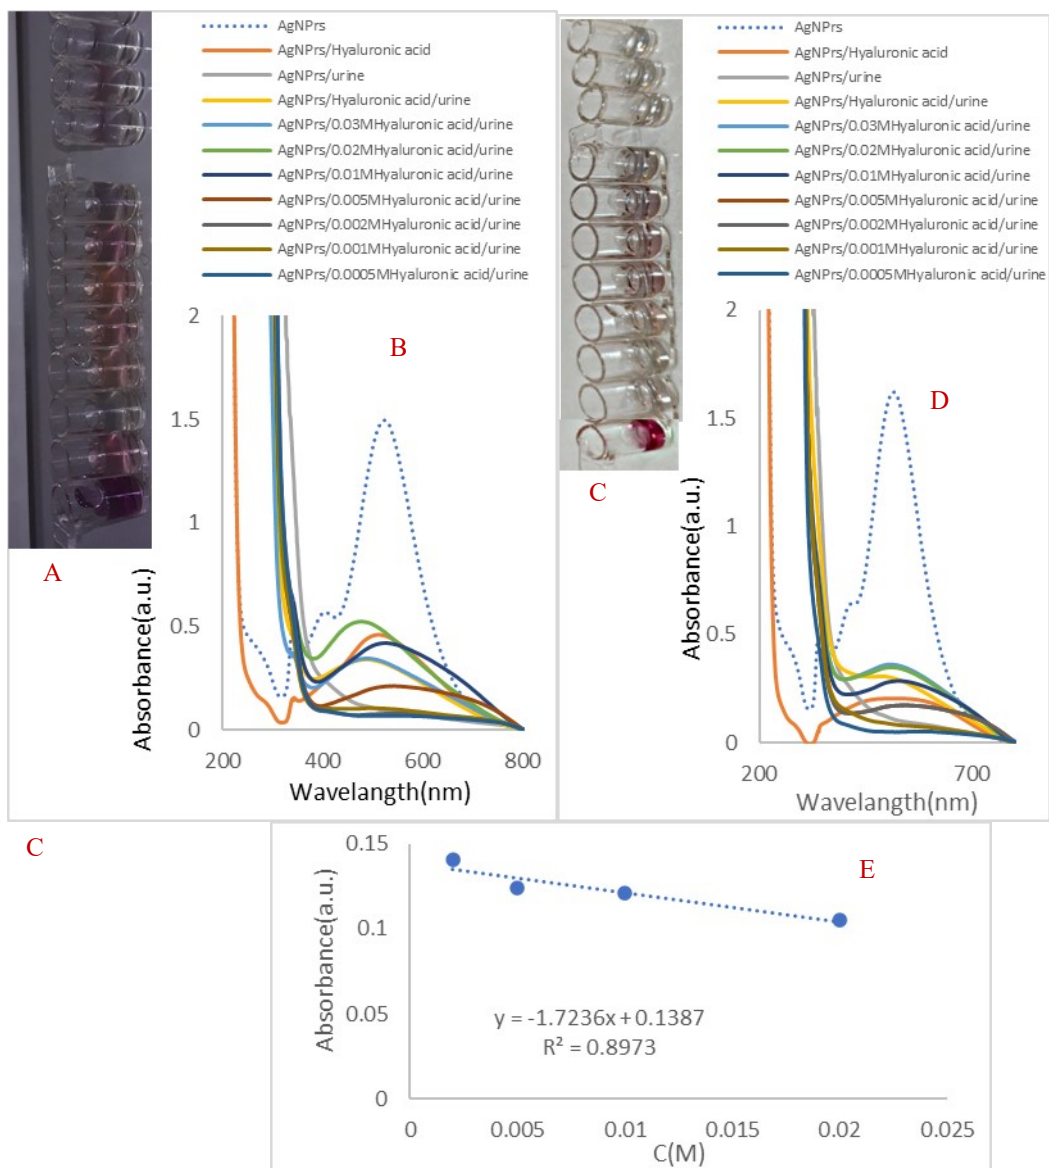

**Fig. S3.** (A&C) Photographic images for colorimetric determination of HA (0.03, 0.02, 0.01, 0.005, 0.002, 0.001, 0.0005 M) spiked in human urine sample. **B&D)** UV-Vis spectrum of TA-AgNPs after interaction with different concentrations of HA (0.03, 0.02, 0.01, 0.005, 0.002, 0.001, 0.0005 M). **E)** Calibration curve.

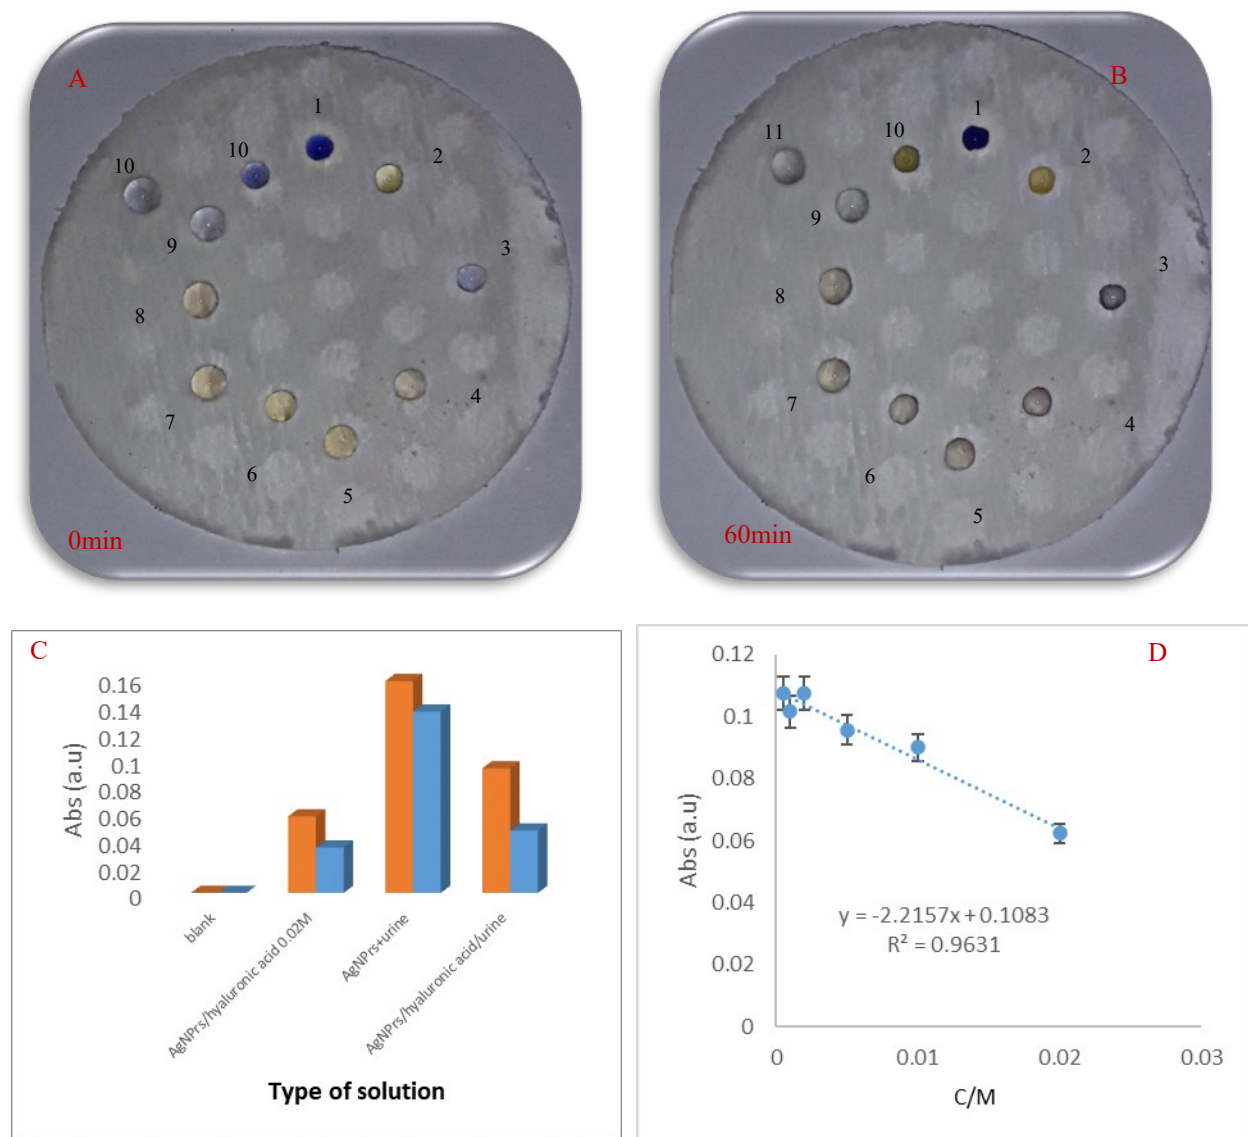

**Fig. S4.** (A&B) High-resolution images of  $\mu$ PAD for (1) AgNPrs (2) AgNPrs/HA, (3) AgNPrs/ urine, (4) (1:1V/V), (4) AgNPrs/ HA /urine, (5) AgNPrs/ HA 0.03M +urine, (6) AgNPrs/ HA 0.02M +urine, (7) AgNPrs/ HA 0.01M +urine, (8) AgNPrs/ HA 0.005M +urine, (9) AgNPrs/ HA 0.002M +urine, (10) AgNPrs/ HA 0.001M +urine, (11) AgNPrs/ HA 0.0005M +urine, (1:0.5:0.5 V/V), in reaction time of 0 and 60 min, respectively. (C) Histogram curve of the absorbance of optical sensor *versus* type of solution [HA 0.02M /AgNPrs, AgNPrs/urine, AgNPrs/HA/urine] in reaction time of 0 and 60 min, respectively. (D). Calibration curves of the absorbance of chemosensor in urine/ AgNPs/HA.



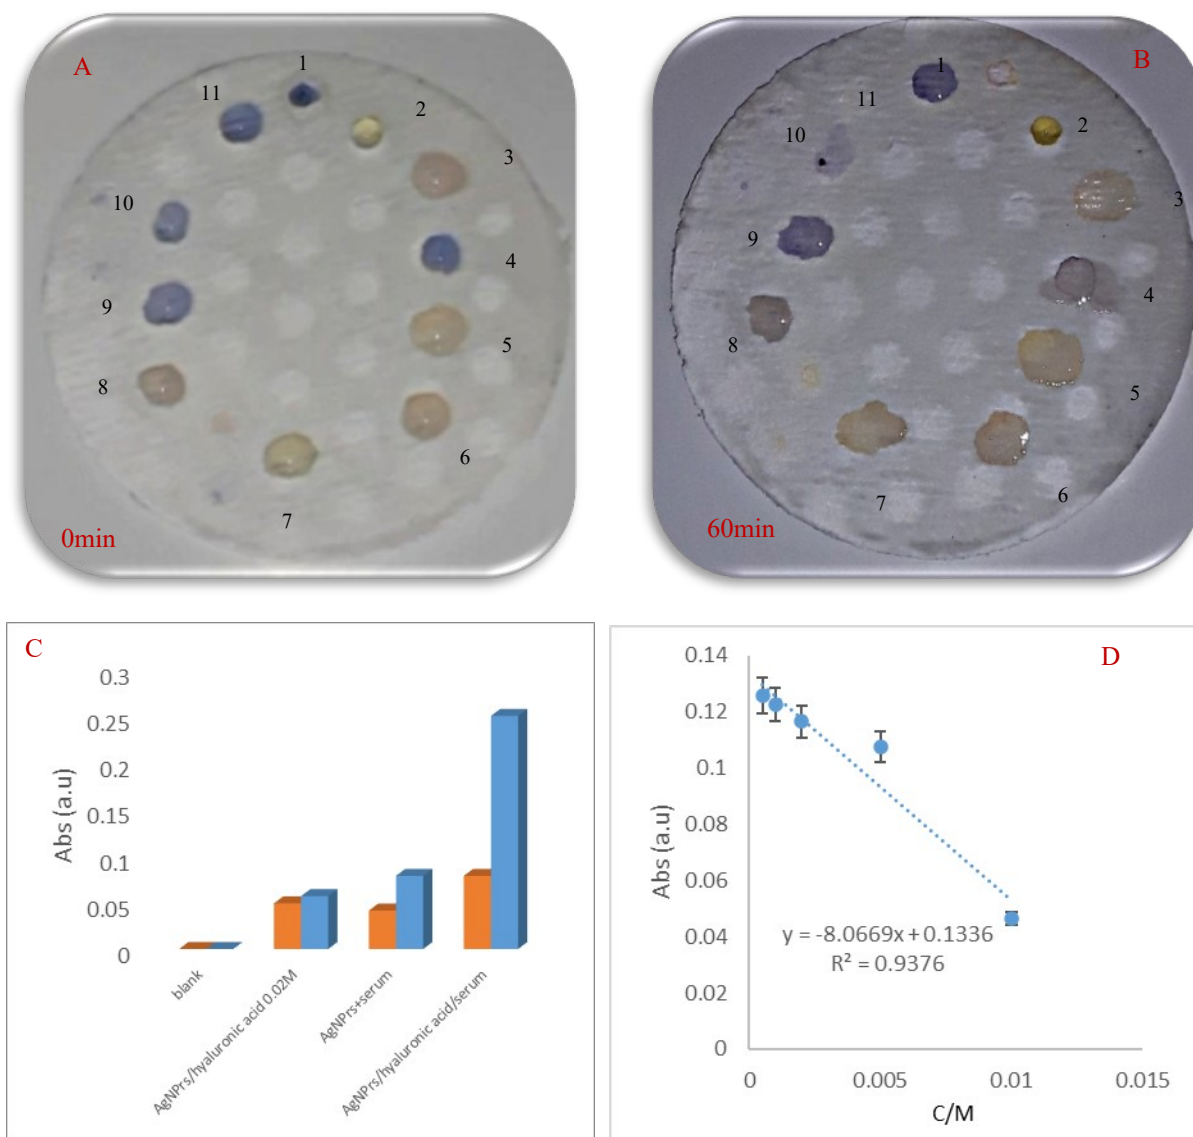

**Fig S5.** (A&B) High-resolution images of  $\mu$ PCD for (1) AgNPrs (2) AgNPrs/HA, (3) AgNPrs/ serum, (4) (1:1V/V), (4) AgNPrs/ HA /serum, (5) AgNPrs/ HA 0.03M /serum, (6) AgNPrs/ HA 0.02M /serum, (7) AgNPrs/ HA 0.01M /serum, (8) AgNPrs/ HA 0.005M /serum, (9) AgNPrs/ HA 0.002M /serum, (10) AgNPrs/ HA 0.001M/serum, (11) AgNPrs/ HA 0.0005M /serum, (1:0.5:0.5 V/V), (A). High-resolution images of  $\mu$ PAD in reaction time of 0 and 60 min, respectively. (C) Histogram curve of the absorbance of optical sensor *versus* type of solution [HA 0.02M /AgNPrs, AgNPrs/serum, AgNPrs/ HA /serum] in reaction time of 0 and 60 min, respectively (D) Calibration curves of the absorbance of chemosensor in serum/ AgNPs/HA.



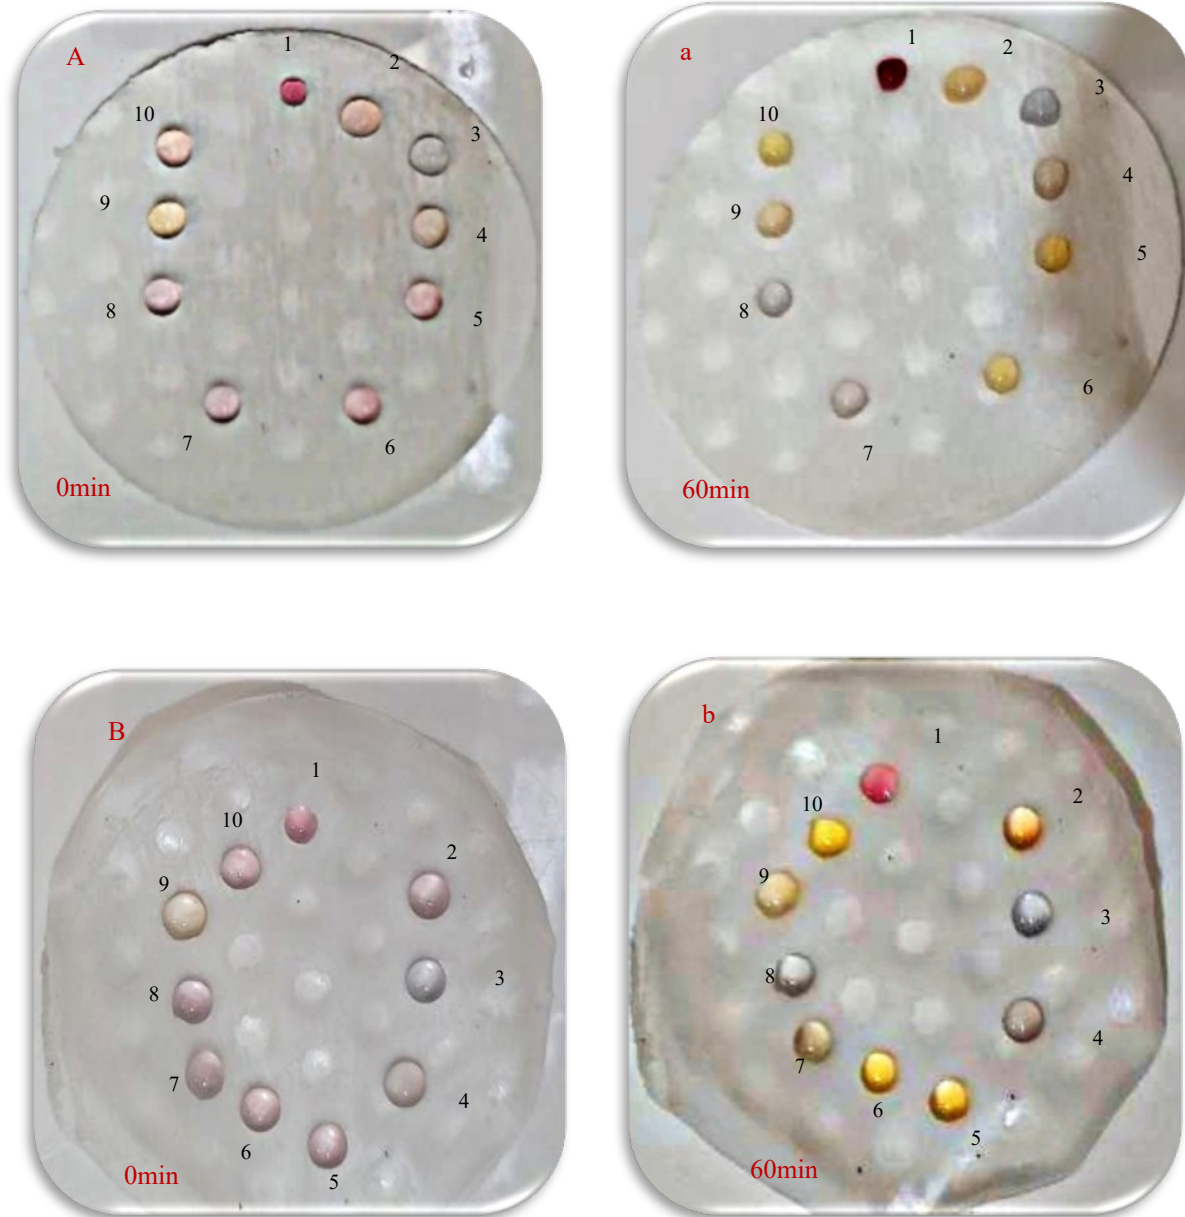

**Fig. S6.** High-resolution images of  $\mu$ PCD and Parafilm for (1) AgNPrs (2) AgNPrs/HA/ Glycine, (3) AgNPrs/ HA /Cysteine, (4) AgNPrs/ HA /Met, (5) AgNPrs/ HA /Pro, (6) AgNPrs/ HA /Phenyl, (7) AgNPrs/ HA /Aspartic acid, (8) AgNPrs/ HA /Ascorbic acid, (9) AgNPrs/ HA /Dopamine, (10) AgNPrs/ HA /urine (1:0.5:0.5 V/V), (A, a). High-resolution images of  $\mu$ PCD in 60min, (B, b). High-resolution images of parafilm in various incubation times of 0 and 60min.

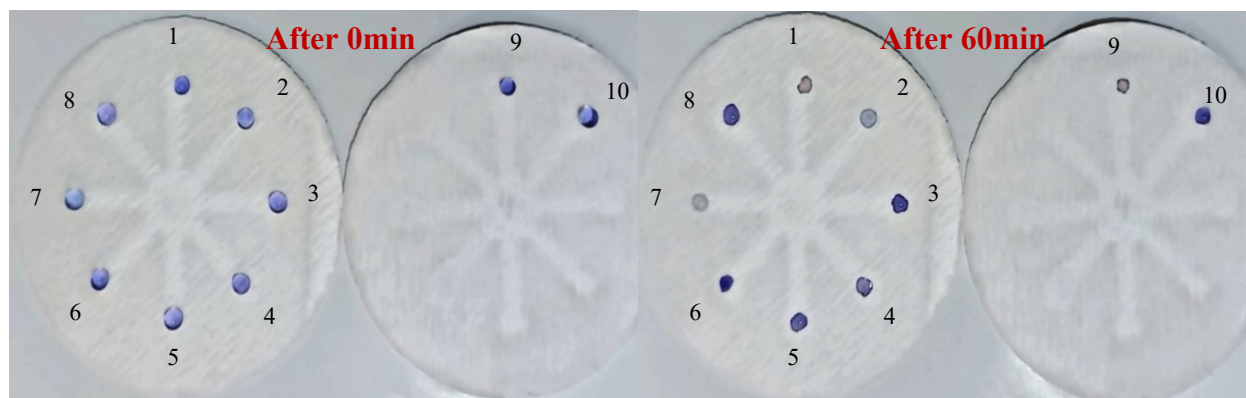

**Fig. S7.** Photographic images of the  $\mu$ PAD at different reaction times. (1) AgNPrs, (2) AgNPrs + Phe, (3) AgNPrs + Gly, (4) AgNPrs + Met, (5) AgNPrs + Cys, (6) AgNPrs + Pro, (7) AgNPrs+ Ascorbic, (8) AgNPrs + Asp (9) AgNPrs + DA (10) AgNPrs + UA. Concentration of AA was 10 mM The ration of reagents was (1: 1) v/v in different incubation time of 0 and 60 min.

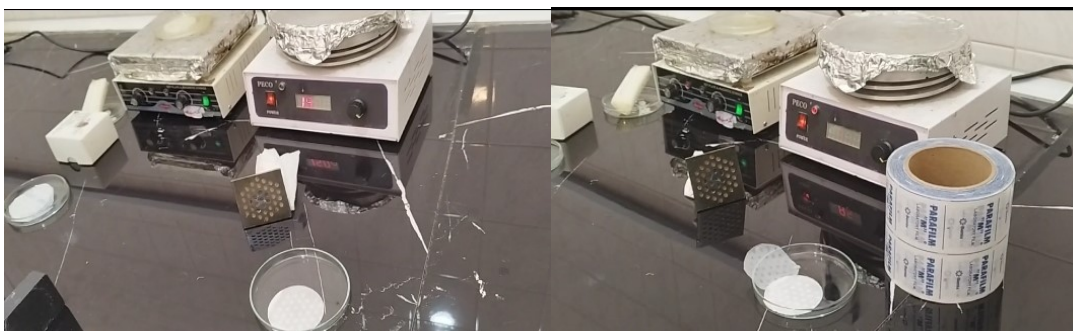

**Scheme S1.** Photographic images for Paper and parafilm based  $\mu$ PAD fabrication.
